# Supplementary material
Source: PubMed Central journal article supplement (PMC7415992)
Supplement: supp_RA119.009903_153679_3_supp_533600_q1mtrg.pdf [file supp_RA119.009903_153679_3_supp_533600_q1mtrg.pdf]

## **Supporting Information**

### **The ASAP1 BAR domain directly binds to actin filaments**

Pei-Wen Chen<sup>1</sup>, Neil Billington<sup>2</sup>, Ben Y. Maron<sup>1</sup>, Jeffrey A. Sload<sup>1</sup>, Krishna Chinthalapudi<sup>3</sup> and Sarah M. Heissler<sup>3\*</sup>

<sup>1</sup>Department of Biology, Williams College, Williamstown, Massachusetts 01267, United States;

<sup>2</sup>Laboratory of Molecular Physiology, National Heart, Lung, and Blood Institute, Bethesda, Maryland 20892, United States; <sup>3</sup>Department of Physiology and Cell Biology, Dorothy M. Davis Heart and Lung Research Institute, The Ohio State University Wexner Medical Center, Columbus, Ohio 43210, United States

\*Corresponding author: Sarah M. Heissler, Department of Physiology and Cell Biology, Dorothy M. Davis Heart and Lung Research Institute, The Ohio State University Wexner Medical Center, 460 Medical Center Drive, 425A IBMR, Columbus, Ohio 43210, United States, Tel.: (614) 293-6481; E-mail: sarah.heissler@osumc.edu

### **Supporting Information Material**

Supporting Figures S1-S2

**Fig. S1**

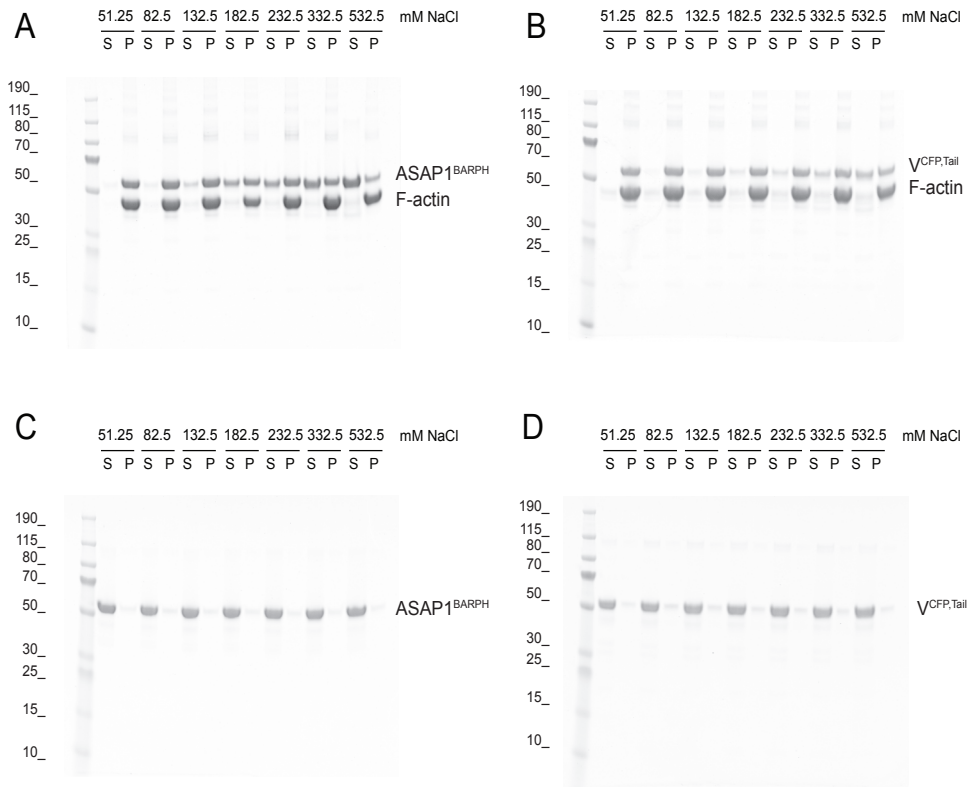

**Supporting Figure 1.** *The interaction between F-actin and ASAP1<sup>BARPH</sup> depends on the ionic strength.* (A,B) Increasing concentrations of NaCl from ~ 50-500 mM partially dissociate the complex between F-actin and ASAP1<sup>BARPH</sup> (A) and F-actin and V<sup>CFP,Tail</sup> (B), indicating that electrostatic interactions are involved in complex formation. S and P indicate supernatant and pellet, respectively. Increasing NaCl concentrations do not affect the sedimentation behavior of ASAP1<sup>BARPH</sup> (C) and V<sup>CFP,Tail</sup> (D) in the absence of F-actin.

Fig. S2

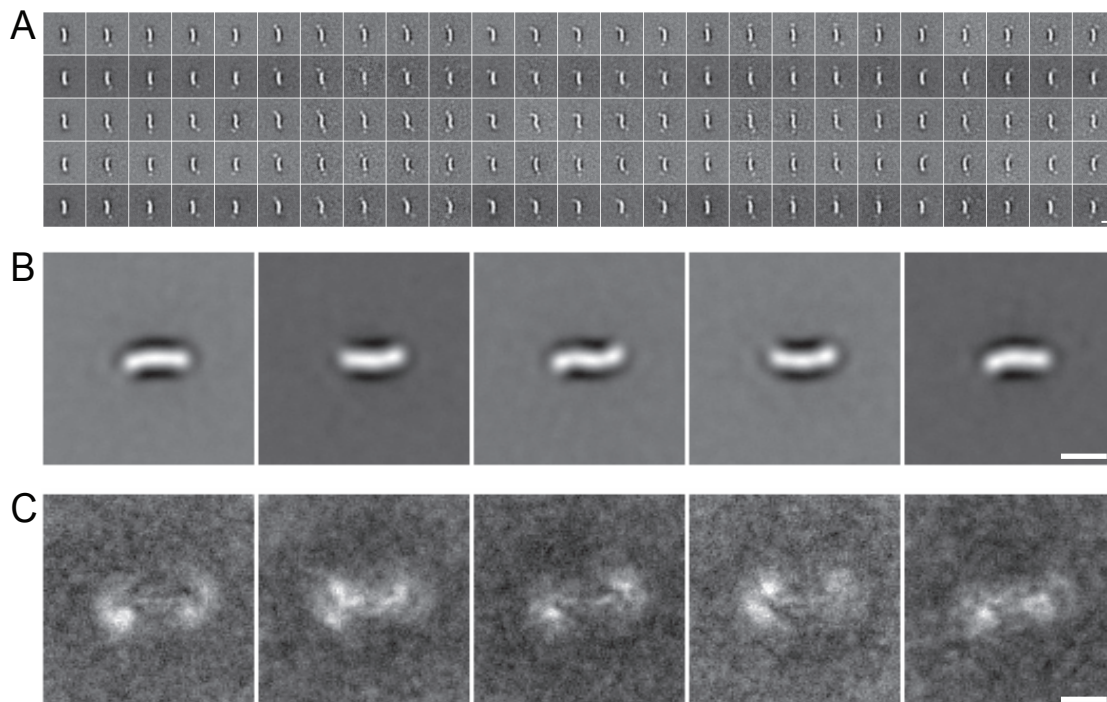

**Supporting Figure 2.** *Systematic classification of ASAP1<sup>BARPH</sup> electron micrographs.* (A) Montage of 125 classes for ASAP1<sup>BARPH</sup>. Each row of the montage shows a similar N-BAR domain orientation, each column a similar pair of PH domain orientations. Scale bar: 10 nm. (B) Class averages following classification of ASAP1<sup>BARPH</sup> into five N-BAR domain classes. Scale bar: 10 nm. (C) Class variances following classification of ASAP1<sup>BARPH</sup> into five N-BAR domain classes (whiter represents higher pixel variance in a given position). Scale bar: 10 nm. Panels (B) and (C) are rotated 90° relative to (A).
